# Supplementary material for: Comparative Analysis of Growth, Survival, and Virulence Characteristics of Listeria monocytogenes Isolated from Imported Meat
Source: MDPI journal article supplement (doi:10.3390/microorganisms12020345), 2024-02-07
Supplement: s1 [file s1]

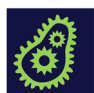

## Article

# Comparative Analysis of Growth, Survival, and Virulence Characteristics of *Listeria monocytogenes* Isolated from Imported Meat

Xinye Pan <sup>1,†</sup>, Jinling Shen <sup>2,†</sup>, Yi Hong <sup>1</sup>, Yufan Wu <sup>3</sup>, Dehua Guo <sup>2</sup>, Lina Zhao <sup>2</sup>, Xiangfeng Bu <sup>1</sup>, Leijie Ben <sup>1</sup> and Xiang Wang <sup>1,\*</sup>

## Supplementary Materials

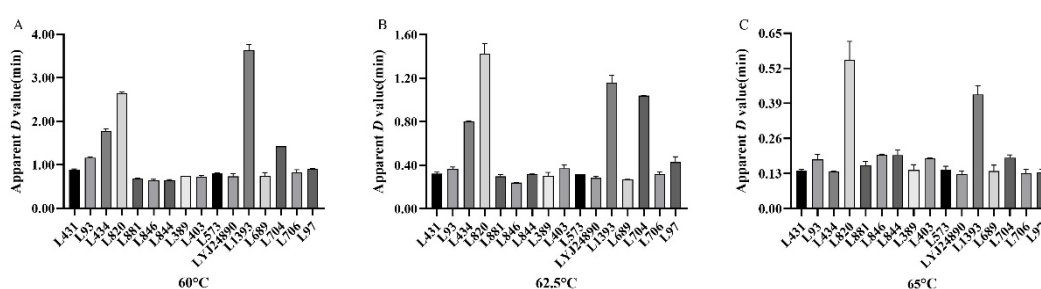

Figure S1. The D-value of *L. monocytogenes* strains at 60°C (A), 62.5°C (B), and 65°C (C).

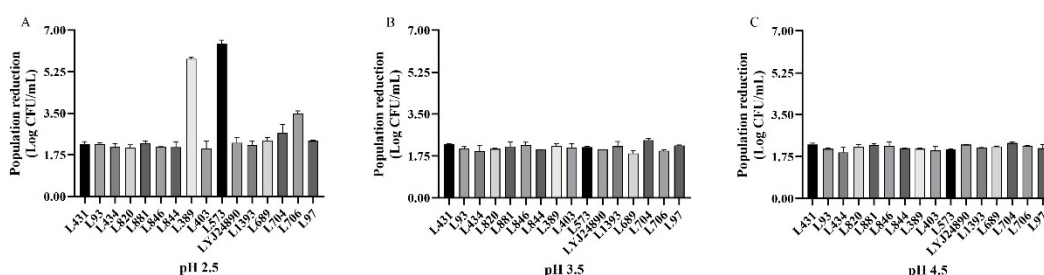

Figure S2. Population reduction of *L. monocytogenes* strains at pH 2.5 (A), pH 3.5 (B), and pH 4.5 (C).

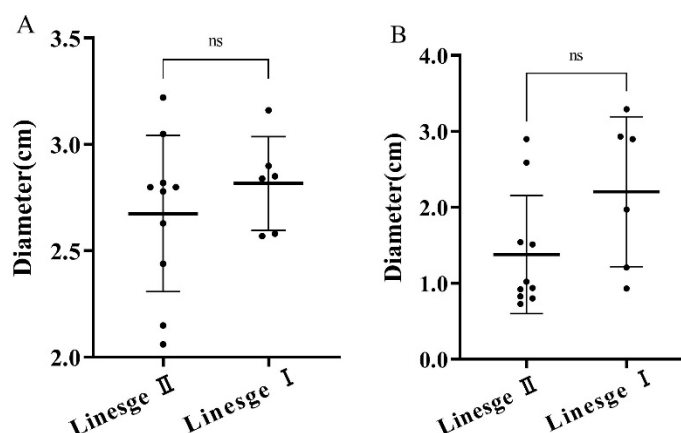

Figure S3. Comparison of swimming (A) and swarming (B) of *L. monocytogenes* strains of the lineage.

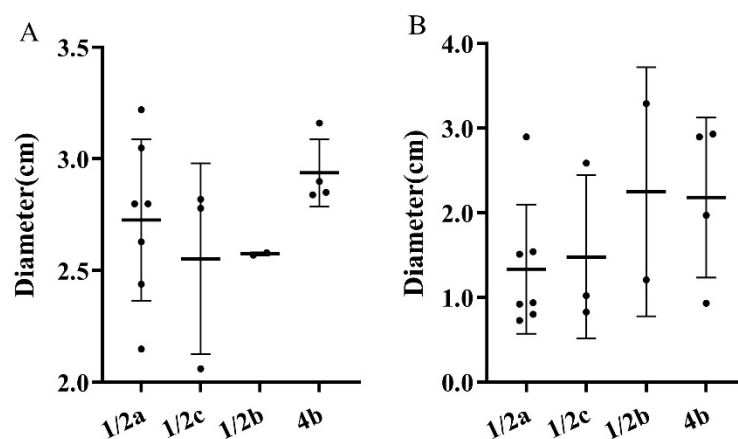

**Figure S4.** Comparison of swimming (A) and swarming (B) of *L. monocytogenes* strains of the serogroup.

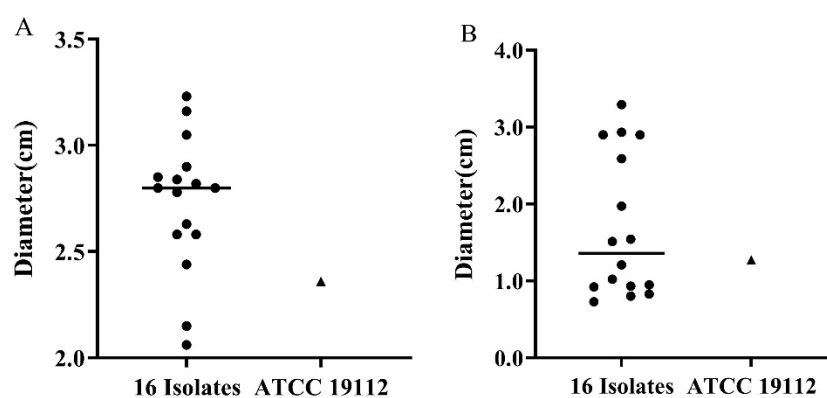

**Figure S5.** Comparison of swimming (A) and swarming (B) of *L. monocytogenes* strains.

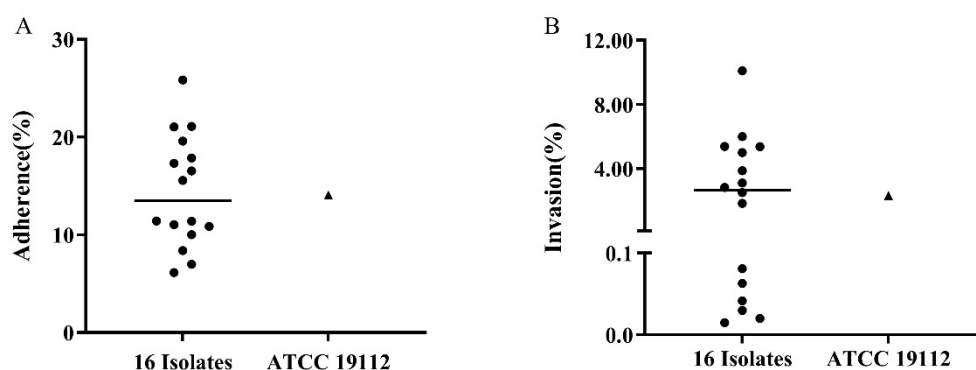

**Figure S6.** Comparison of adhesion (A) and invasion (B) of *L. monocytogenes* strains.

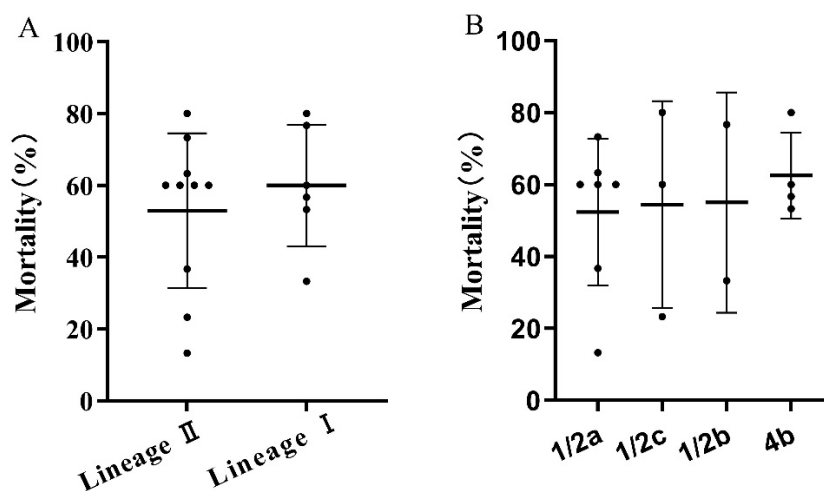

**Figure S7.** Comparison of virulence of t *L. monocytogenes* of the lineage (A) and serogroup (B) in *Galleria* model.

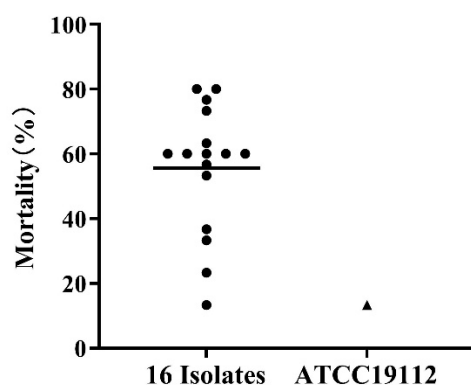

**Figure S8.** Comparison of virulence of *L. monocytogenes* in *Galleria* model.

**Table S1.** The growth characteristics parameters  $\mu_{max}$  and  $\lambda$  of *L. monocytogenes* strains.

| Strain              | 25 °C               |                 | 30 °C               |                 | 37 °C               |                 |
|---------------------|---------------------|-----------------|---------------------|-----------------|---------------------|-----------------|
|                     | $\mu_{max}(h^{-1})$ | $\lambda(h)$    | $\mu_{max}(h^{-1})$ | $\lambda(h)$    | $\mu_{max}(h^{-1})$ | $\lambda(h)$    |
| L431                | $0.73 \pm 0.01$     | $2.79 \pm 0.11$ | $0.92 \pm 0.02$     | $2.55 \pm 0.20$ | $0.96 \pm 0.01$     | $2.00 \pm 0.08$ |
| L93                 | $0.68 \pm 0.00$     | $3.52 \pm 0.12$ | $0.90 \pm 0.00$     | $2.69 \pm 0.04$ | $1.04 \pm 0.00$     | $2.34 \pm 0.11$ |
| L434                | $0.76 \pm 0.00$     | $2.15 \pm 0.10$ | $0.94 \pm 0.01$     | $2.15 \pm 0.18$ | $1.08 \pm 0.03$     | $2.23 \pm 0.15$ |
| L820                | $0.62 \pm 0.01$     | $2.52 \pm 0.09$ | $0.93 \pm 0.02$     | $2.07 \pm 0.23$ | $1.03 \pm 0.04$     | $2.13 \pm 0.27$ |
| L881                | $0.73 \pm 0.00$     | $2.70 \pm 0.25$ | $0.94 \pm 0.00$     | $2.04 \pm 0.11$ | $1.12 \pm 0.07$     | $1.65 \pm 0.31$ |
| L846                | $0.62 \pm 0.00$     | $2.72 \pm 0.05$ | $0.93 \pm 0.02$     | $2.33 \pm 0.16$ | $1.06 \pm 0.02$     | $1.86 \pm 0.07$ |
| L844                | $0.62 \pm 0.01$     | $2.85 \pm 0.16$ | $0.95 \pm 0.01$     | $2.02 \pm 0.06$ | $1.08 \pm 0.02$     | $2.32 \pm 0.04$ |
| L389                | $0.71 \pm 0.00$     | $2.90 \pm 0.04$ | $0.92 \pm 0.00$     | $2.33 \pm 0.20$ | $1.11 \pm 0.00$     | $1.75 \pm 0.05$ |
| L403                | $0.61 \pm 0.00$     | $2.66 \pm 0.09$ | $0.93 \pm 0.01$     | $2.57 \pm 0.04$ | $0.95 \pm 0.01$     | $1.72 \pm 0.17$ |
| L573                | $0.69 \pm 0.01$     | $3.34 \pm 0.21$ | $0.94 \pm 0.03$     | $1.85 \pm 0.08$ | $1.02 \pm 0.01$     | $2.23 \pm 0.05$ |
| LYJ24890            | $0.70 \pm 0.00$     | $3.11 \pm 0.01$ | $0.91 \pm 0.02$     | $2.16 \pm 0.19$ | $1.18 \pm 0.00$     | $1.72 \pm 0.16$ |
| L1393               | $0.61 \pm 0.00$     | $2.39 \pm 0.01$ | $0.94 \pm 0.00$     | $2.57 \pm 0.03$ | $1.08 \pm 0.01$     | $1.81 \pm 0.07$ |
| L689                | $0.73 \pm 0.00$     | $3.06 \pm 0.26$ | $0.92 \pm 0.01$     | $2.32 \pm 0.09$ | $1.13 \pm 0.01$     | $2.33 \pm 0.09$ |
| L704                | $0.73 \pm 0.01$     | $2.87 \pm 0.05$ | $0.93 \pm 0.00$     | $2.41 \pm 0.17$ | $1.07 \pm 0.00$     | $1.85 \pm 0.10$ |
| L706                | $0.77 \pm 0.01$     | $2.21 \pm 0.43$ | $0.96 \pm 0.01$     | $2.78 \pm 0.09$ | $1.20 \pm 0.00$     | $1.68 \pm 0.29$ |
| L97                 | $0.74 \pm 0.00$     | $3.55 \pm 0.12$ | $0.98 \pm 0.01$     | $2.75 \pm 0.15$ | $1.24 \pm 0.03$     | $1.67 \pm 0.17$ |
| Avg $\pm$ variation | $0.69 \pm 0.06$     | $2.83 \pm 0.42$ | $0.93 \pm 0.02$     | $2.35 \pm 0.28$ | $1.09 \pm 0.08$     | $1.96 \pm 0.26$ |
